# Supplementary material for: Revisiting Vaccine Hesitancy in Residential Care Homes for the Elderly for Pandemic Preparedness: A Lesson from COVID-19
Source: MDPI journal article supplement (doi:10.3390/vaccines11111700), 2023-11-08
Supplement: s1 [file s1]

## SUPPLEMENTARY MATERIALS

**Table S1A.** Multilevel regression analysis predicting residents' overall vaccine hesitancy (5C), with the institution ID as the second-level factor

|                                               | Model 1 (N = 186, RCHE = 26) |       |        |          | Model 2 (N = 150, RCHE = 20) |       |        |          |
|-----------------------------------------------|------------------------------|-------|--------|----------|------------------------------|-------|--------|----------|
|                                               | b                            | SE    | t      | p        | b                            | SE    | t      | p        |
| Age                                           | -0.013                       | 0.004 | -2.924 | 0.004**  | -0.015                       | 0.005 | -2.950 | 0.004**  |
| Female                                        | 0.016                        | 0.119 | 0.136  | 0.892    | 0.116                        | 0.138 | 0.837  | 0.404    |
| Emotional loneliness                          | -0.033                       | 0.038 | -0.882 | 0.379    | -0.007                       | 0.042 | -0.159 | 0.874    |
| Social loneliness                             | 0.016                        | 0.025 | 0.628  | 0.531    | 0.045                        | 0.028 | 1.602  | 0.112    |
| Anxiety                                       | 0.132                        | 0.026 | 5.142  | 0.000*** | 0.136                        | 0.028 | 4.792  | 0.000*** |
| Mini-Cog score                                | -0.204                       | 0.065 | -3.127 | 0.002**  | -0.225                       | 0.075 | -2.979 | 0.003**  |
| Number of doses taken                         | -0.292                       | 0.077 | -3.788 | 0.000*** | -0.318                       | 0.086 | -3.715 | 0.000*** |
| Ever infected by COVID-19                     | -0.222                       | 0.163 | -1.364 | 0.174    | -0.249                       | 0.174 | -1.433 | 0.154    |
| Care level                                    | -0.026                       | 0.073 | -0.357 | 0.722    | -0.089                       | 0.080 | -1.107 | 0.270    |
| Size of the residential home                  |                              |       |        |          | 0.000                        | 0.001 | -0.080 | 0.937    |
| Resident infected rate                        |                              |       |        |          | -0.616                       | 0.618 | -0.997 | 0.323    |
| RCHE's vaccination rate (with 1 dose or more) |                              |       |        |          | -0.402                       | 0.224 | -1.800 | 0.088.   |

.  $p < 0.10$ , \* $p < 0.05$ , \*\* $p < 0.01$ , \*\*\* $p < 0.001$ .

**Table S1B.** Multilevel regression analysis predicting residents' vaccine confidence, with the institution ID as the second-level factor

|                                               | Model 1 (N = 186, RCHE = 26) |       |        |         | Model 2 (N = 150, RCHE = 20) |       |        |        |
|-----------------------------------------------|------------------------------|-------|--------|---------|------------------------------|-------|--------|--------|
|                                               | b                            | SE    | t      | p       | b                            | SE    | t      | p      |
| Age                                           | 0.002                        | 0.009 | 0.242  | 0.809   | -0.006                       | 0.010 | -0.668 | 0.505  |
| Female                                        | 0.105                        | 0.225 | 0.466  | 0.642   | -0.314                       | 0.262 | -1.196 | 0.234  |
| Emotional loneliness                          | 0.110                        | 0.074 | 1.483  | 0.140   | 0.110                        | 0.082 | 1.333  | 0.185  |
| Social loneliness                             | -0.046                       | 0.049 | -0.937 | 0.350   | -0.068                       | 0.054 | -1.257 | 0.211  |
| Anxiety                                       | -0.161                       | 0.051 | -3.169 | 0.002** | -0.143                       | 0.055 | -2.597 | 0.010* |
| Mini-Cog score                                | 0.039                        | 0.127 | 0.307  | 0.759   | 0.135                        | 0.143 | 0.942  | 0.348  |
| Number of doses taken                         | 0.257                        | 0.138 | 1.862  | 0.064.  | 0.350                        | 0.155 | 2.263  | 0.025* |
| Ever infected by COVID-19                     | 0.327                        | 0.317 | 1.033  | 0.303   | 0.624                        | 0.333 | 1.870  | 0.064. |
| Care level                                    | -0.066                       | 0.131 | -0.504 | 0.615   | 0.100                        | 0.149 | 0.669  | 0.504  |
| Size of the residential home                  |                              |       |        |         | 0.002                        | 0.002 | 1.274  | 0.205  |
| Resident infected rate                        |                              |       |        |         | 0.907                        | 1.064 | 0.853  | 0.395  |
| RCHE's vaccination rate (with 1 dose or more) |                              |       |        |         | 0.571                        | 0.341 | 1.674  | 0.096. |

.  $p < 0.10$ , \* $p < 0.05$ , \*\* $p < 0.01$ , \*\*\* $p < 0.001$ .

**Table S1C.** Multilevel regression analysis predicting residents' vaccine complacency, with the institution ID as the second-level factor

|                                               | Model 1 (N = 184, RCHE = 26) |       |        |        | Model 2 (N = 148, RCHE = 20) |       |        |        |
|-----------------------------------------------|------------------------------|-------|--------|--------|------------------------------|-------|--------|--------|
|                                               | b                            | SE    | t      | p      | b                            | SE    | t      | p      |
| Age                                           | -0.004                       | 0.011 | -0.345 | 0.730  | -0.007                       | 0.013 | -0.510 | 0.611  |
| Female                                        | -0.158                       | 0.286 | -0.555 | 0.580  | -0.291                       | 0.352 | -0.826 | 0.410  |
| Emotional loneliness                          | -0.020                       | 0.091 | -0.219 | 0.827  | 0.046                        | 0.108 | 0.424  | 0.672  |
| Social loneliness                             | 0.052                        | 0.061 | 0.866  | 0.387  | 0.043                        | 0.071 | 0.605  | 0.546  |
| Anxiety                                       | 0.117                        | 0.063 | 1.865  | 0.064. | 0.133                        | 0.072 | 1.840  | 0.068. |
| Mini-Cog score                                | -0.192                       | 0.157 | -1.222 | 0.223  | -0.290                       | 0.189 | -1.532 | 0.128  |
| Number of doses taken                         | -0.280                       | 0.178 | -1.574 | 0.118  | -0.333                       | 0.210 | -1.583 | 0.116  |
| Ever infected by COVID-19                     | -0.347                       | 0.393 | -0.884 | 0.378  | -0.256                       | 0.440 | -0.582 | 0.562  |
| Care level                                    | -0.086                       | 0.170 | -0.505 | 0.614  | -0.193                       | 0.202 | -0.956 | 0.341  |
| Size of the residential home                  |                              |       |        |        | 0.002                        | 0.003 | 0.624  | 0.541  |
| Resident infected rate                        |                              |       |        |        | -1.279                       | 1.473 | -0.868 | 0.388  |
| RCHE's vaccination rate (with 1 dose or more) |                              |       |        |        | -1.085                       | 0.500 | -2.170 | 0.039* |

.  $p < 0.10$ , \* $p < 0.05$ , \*\* $p < 0.01$ , \*\*\* $p < 0.001$ .

**Table S1D.** Multilevel regression analysis predicting residents' vaccine calculation, with the institution ID as the second-level factor

| factor                                        | Model 1 (N = 185, RCHE = 26) |       |        |        | Model 2 (N = 149, RCHE = 20) |       |        |        |
|-----------------------------------------------|------------------------------|-------|--------|--------|------------------------------|-------|--------|--------|
|                                               | b                            | SE    | t      | p      | b                            | SE    | t      | p      |
| Age                                           | -0.021                       | 0.011 | -1.836 | 0.068  | -0.026                       | 0.013 | -1.998 | 0.048* |
| Female                                        | 0.071                        | 0.305 | 0.232  | 0.817  | 0.223                        | 0.357 | 0.627  | 0.532  |
| Emotional loneliness                          | -0.001                       | 0.097 | -0.014 | 0.989  | 0.051                        | 0.109 | 0.466  | 0.642  |
| Social loneliness                             | -0.140                       | 0.064 | -2.174 | 0.031* | -0.100                       | 0.073 | -1.383 | 0.169  |
| Anxiety                                       | 0.089                        | 0.066 | 1.336  | 0.183  | 0.061                        | 0.073 | 0.835  | 0.406  |
| Mini-Cog score                                | -0.119                       | 0.167 | -0.717 | 0.475  | -0.032                       | 0.194 | -0.165 | 0.870  |
| Number of doses taken                         | -0.290                       | 0.194 | -1.496 | 0.137  | -0.137                       | 0.222 | -0.615 | 0.540  |
| Ever infected by COVID-19                     | -0.650                       | 0.418 | -1.554 | 0.122  | -0.353                       | 0.447 | -0.788 | 0.432  |
| Care level                                    | 0.138                        | 0.183 | 0.754  | 0.452  | 0.158                        | 0.207 | 0.762  | 0.448  |
| Size of the residential home                  |                              |       |        |        | 0.001                        | 0.003 | 0.371  | 0.716  |
| Resident infected rate                        |                              |       |        |        | -0.988                       | 1.633 | -0.605 | 0.548  |
| RCHE's vaccination rate (with 1 dose or more) |                              |       |        |        | -0.493                       | 0.607 | -0.811 | 0.428  |

.  $p < 0.10$ , \* $p < 0.05$ , \*\* $p < 0.01$ , \*\*\* $p < 0.001$ .

**Table S1E.** Multilevel regression analysis predicting residents' vaccine constraints, with the institution ID as the second-level factor

| factor                                        | Model 1 (N = 185, RCHE = 26) |       |        |          | Model 2 (N = 150, RCHE = 20) |       |        |          |
|-----------------------------------------------|------------------------------|-------|--------|----------|------------------------------|-------|--------|----------|
|                                               | b                            | SE    | t      | p        | b                            | SE    | t      | p        |
| Age                                           | -0.021                       | 0.007 | -2.938 | 0.004**  | -0.023                       | 0.009 | -2.639 | 0.009**  |
| Female                                        | -0.004                       | 0.187 | -0.023 | 0.982    | -0.015                       | 0.240 | -0.061 | 0.952    |
| Emotional loneliness                          | -0.069                       | 0.059 | -1.168 | 0.244    | -0.044                       | 0.074 | -0.592 | 0.555    |
| Social loneliness                             | 0.026                        | 0.039 | 0.666  | 0.506    | 0.070                        | 0.049 | 1.434  | 0.154    |
| Anxiety                                       | 0.195                        | 0.041 | 4.804  | 0.000*** | 0.221                        | 0.050 | 4.460  | 0.000*** |
| Mini-Cog score                                | -0.228                       | 0.102 | -2.225 | 0.027*   | -0.203                       | 0.131 | -1.545 | 0.125    |
| Number of doses taken                         | -0.356                       | 0.119 | -2.987 | 0.003**  | -0.395                       | 0.148 | -2.669 | 0.009**  |
| Ever infected by COVID-19                     | 0.042                        | 0.256 | 0.165  | 0.869    | 0.000                        | 0.303 | 0.000  | 1.000    |
| Care level                                    | -0.014                       | 0.113 | -0.127 | 0.899    | -0.061                       | 0.139 | -0.438 | 0.662    |
| Size of the residential home                  |                              |       |        |          | 0.000                        | 0.002 | 0.166  | 0.871    |
| Resident infected rate                        |                              |       |        |          | 0.694                        | 1.062 | 0.654  | 0.516    |
| RCHE's vaccination rate (with 1 dose or more) |                              |       |        |          | 0.403                        | 0.379 | 1.062  | 0.303    |

.  $p < 0.10$ , \* $p < 0.05$ , \*\* $p < 0.01$ , \*\*\* $p < 0.001$ .

**Table S1F.** Multilevel regression analysis predicting residents' vaccine collective responsibility, with the institution ID as the second-level factor

| factor                                        | Model 1 (N = 186, RCHE = 26) |       |        |          | Model 2 (N = 150, RCHE = 20) |       |        |         |
|-----------------------------------------------|------------------------------|-------|--------|----------|------------------------------|-------|--------|---------|
|                                               | b                            | SE    | t      | p        | b                            | SE    | t      | p       |
| Age                                           | 0.019                        | 0.008 | 2.346  | 0.020*   | 0.024                        | 0.010 | 2.338  | 0.021*  |
| Female                                        | -0.161                       | 0.221 | -0.731 | 0.466    | -0.296                       | 0.281 | -1.055 | 0.293   |
| Emotional loneliness                          | 0.005                        | 0.071 | 0.069  | 0.945    | -0.008                       | 0.087 | -0.095 | 0.924   |
| Social loneliness                             | -0.076                       | 0.047 | -1.621 | 0.107    | -0.126                       | 0.058 | -2.176 | 0.031*  |
| Anxiety                                       | -0.130                       | 0.048 | -2.684 | 0.008**  | -0.133                       | 0.059 | -2.276 | 0.025*  |
| Mini-Cog score                                | 0.430                        | 0.121 | 3.542  | 0.001*** | 0.481                        | 0.153 | 3.137  | 0.002** |
| Number of doses taken                         | 0.178                        | 0.140 | 1.270  | 0.206    | 0.271                        | 0.169 | 1.610  | 0.112   |
| Ever infected by COVID-19                     | -0.301                       | 0.304 | -0.991 | 0.323    | -0.199                       | 0.356 | -0.558 | 0.578   |
| Care level                                    | 0.079                        | 0.133 | 0.597  | 0.551    | 0.257                        | 0.161 | 1.598  | 0.113   |
| Size of the residential home                  |                              |       |        |          | 0.002                        | 0.002 | 0.739  | 0.486   |
| Resident infected rate                        |                              |       |        |          | 0.016                        | 1.172 | 0.013  | 0.989   |
| RCHE's vaccination rate (with 1 dose or more) |                              |       |        |          | 0.272                        | 0.391 | 0.696  | 0.501   |

\*.  $p < 0.10$ , \* $p < 0.05$ , \*\* $p < 0.01$ , \*\*\* $p < 0.001$ .

**Table S2A.** Multilevel regression analysis predicting staff's overall vaccine hesitancy (5C), with the institution ID as the second-level factor

|                                               | Model 1 (N = 156, RCHE = 25) |       |        |         | Model 2 (N = 125, RCHE = 18) |       |        |         |
|-----------------------------------------------|------------------------------|-------|--------|---------|------------------------------|-------|--------|---------|
|                                               | b                            | SE    | t      | p       | b                            | SE    | t      | p       |
| Age                                           | 0.000                        | 0.005 | -0.018 | 0.986   | 0.003                        | 0.006 | 0.456  | 0.649   |
| Female                                        | 0.023                        | 0.225 | 0.102  | 0.919   | -0.148                       | 0.258 | -0.575 | 0.566   |
| Emotional loneliness                          | 0.078                        | 0.024 | 3.225  | 0.002** | 0.088                        | 0.028 | 3.125  | 0.002** |
| Social loneliness                             | 0.029                        | 0.025 | 1.189  | 0.236   | 0.036                        | 0.030 | 1.205  | 0.231   |
| Anxiety                                       | 0.061                        | 0.019 | 3.171  | 0.002** | 0.071                        | 0.024 | 2.907  | 0.004** |
| Number of vaccines uptaken                    | -0.247                       | 0.117 | -2.113 | 0.036*  | -0.242                       | 0.118 | -2.044 | 0.043*  |
| Ever infected by COVID-19                     | -0.027                       | 0.110 | -0.249 | 0.804   | 0.006                        | 0.118 | 0.053  | 0.958   |
| Size of the residential home                  |                              |       |        |         | 0.002                        | 0.001 | 2.185  | 0.031*  |
| Resident infected rate                        |                              |       |        |         | 1.033                        | 0.699 | 1.479  | 0.142   |
| RCHE's vaccination rate (with 1 dose or more) |                              |       |        |         | -0.305                       | 0.172 | -1.767 | 0.080.  |

.  $p < 0.10$ , \* $p < 0.05$ , \*\* $p < 0.01$ , \*\*\* $p < 0.001$ .

**Table S2B.** Multilevel regression analysis predicting staff's vaccine confidence, with the institution ID as the second-level factor

|                                               | Model 1 (N = 156, RCHE = 25) |       |        |       | Model 2 (N = 125, RCHE = 18) |       |        |        |
|-----------------------------------------------|------------------------------|-------|--------|-------|------------------------------|-------|--------|--------|
|                                               | b                            | SE    | t      | p     | b                            | SE    | t      | p      |
| Age                                           | 0.011                        | 0.009 | 1.240  | 0.217 | 0.014                        | 0.010 | 1.416  | 0.160  |
| Female                                        | 0.029                        | 0.368 | 0.078  | 0.938 | -0.014                       | 0.412 | -0.034 | 0.973  |
| Emotional loneliness                          | -0.044                       | 0.040 | -1.099 | 0.274 | -0.043                       | 0.045 | -0.963 | 0.337  |
| Social loneliness                             | -0.050                       | 0.040 | -1.247 | 0.214 | -0.092                       | 0.047 | -1.951 | 0.054. |
| Anxiety                                       | -0.045                       | 0.031 | -1.443 | 0.151 | -0.073                       | 0.039 | -1.864 | 0.065. |
| Number of vaccines uptaken                    | 0.055                        | 0.190 | 0.291  | 0.771 | 0.048                        | 0.190 | 0.253  | 0.801  |
| Ever infected by COVID-19                     | -0.092                       | 0.179 | -0.511 | 0.610 | -0.074                       | 0.192 | -0.386 | 0.700  |
| Size of the residential home                  |                              |       |        |       | -0.002                       | 0.001 | -1.362 | 0.262  |
| Resident infected rate                        |                              |       |        |       | -1.091                       | 1.157 | -0.943 | 0.354  |
| RCHE's vaccination rate (with 1 dose or more) |                              |       |        |       | 0.030                        | 0.296 | 0.101  | 0.922  |

.  $p < 0.10$ , \* $p < 0.05$ , \*\* $p < 0.01$ , \*\*\* $p < 0.001$ .

**Table S2C.** Multilevel regression analysis predicting staff's vaccine complacency, with the institution ID as the second-level factor

|                                               | Model 1 (N = 156, RCHE = 25) |       |        |          | Model 2 (N = 125, RCHE = 18) |       |        |          |
|-----------------------------------------------|------------------------------|-------|--------|----------|------------------------------|-------|--------|----------|
|                                               | b                            | SE    | t      | p        | b                            | SE    | t      | p        |
| Age                                           | 0.016                        | 0.011 | 1.520  | 0.131    | 0.024                        | 0.012 | 2.012  | 0.047*   |
| Female                                        | 0.141                        | 0.453 | 0.311  | 0.757    | -0.373                       | 0.505 | -0.740 | 0.461    |
| Emotional loneliness                          | 0.082                        | 0.049 | 1.688  | 0.093.   | 0.157                        | 0.055 | 2.856  | 0.005**  |
| Social loneliness                             | 0.057                        | 0.050 | 1.144  | 0.254    | 0.033                        | 0.058 | 0.578  | 0.565    |
| Anxiety                                       | 0.058                        | 0.039 | 1.502  | 0.135    | 0.058                        | 0.048 | 1.212  | 0.228    |
| Number of vaccines uptaken                    | -0.789                       | 0.234 | -3.377 | 0.001*** | -0.804                       | 0.234 | -3.443 | 0.001*** |
| Ever infected by COVID-19                     | -0.278                       | 0.219 | -1.266 | 0.208    | 0.032                        | 0.236 | 0.136  | 0.892    |
| Size of the residential home                  |                              |       |        |          | 0.004                        | 0.002 | 2.503  | 0.064.   |
| Resident infected rate                        |                              |       |        |          | -0.542                       | 1.420 | -0.381 | 0.705    |
| RCHE's vaccination rate (with 1 dose or more) |                              |       |        |          | -0.606                       | 0.364 | -1.666 | 0.124    |

.  $p < 0.10$ , \* $p < 0.05$ , \*\* $p < 0.01$ , \*\*\* $p < 0.001$ .

**Table S2D.** Multilevel regression analysis predicting staff's vaccine calculation, with the institution ID as the second-level factor

|                                               | Model 1 (N = 156, RCHE = 25) |       |        |       | Model 2 (N = 125, RCHE = 18) |       |        |       |
|-----------------------------------------------|------------------------------|-------|--------|-------|------------------------------|-------|--------|-------|
|                                               | b                            | SE    | t      | p     | b                            | SE    | t      | p     |
| Age                                           | -0.002                       | 0.011 | -0.147 | 0.883 | 0.004                        | 0.012 | 0.371  | 0.712 |
| Female                                        | -0.080                       | 0.484 | -0.166 | 0.869 | 0.074                        | 0.506 | 0.147  | 0.884 |
| Emotional loneliness                          | 0.071                        | 0.052 | 1.373  | 0.172 | 0.012                        | 0.056 | 0.216  | 0.829 |
| Social loneliness                             | -0.062                       | 0.053 | -1.164 | 0.246 | -0.068                       | 0.058 | -1.160 | 0.249 |
| Anxiety                                       | 0.081                        | 0.041 | 1.956  | 0.052 | 0.071                        | 0.049 | 1.449  | 0.150 |
| Number of vaccines uptaken                    | 0.075                        | 0.248 | 0.301  | 0.764 | 0.113                        | 0.240 | 0.470  | 0.639 |
| Ever infected by COVID-19                     | 0.017                        | 0.232 | 0.075  | 0.940 | -0.255                       | 0.246 | -1.035 | 0.303 |
| Size of the residential home                  |                              |       |        |       | -0.003                       | 0.002 | -1.493 | 0.193 |
| Resident infected rate                        |                              |       |        |       | 0.223                        | 1.609 | 0.138  | 0.891 |
| RCHE's vaccination rate (with 1 dose or more) |                              |       |        |       | -0.370                       | 0.446 | -0.829 | 0.424 |

.  $p < 0.10$ , \* $p < 0.05$ , \*\* $p < 0.01$ , \*\*\* $p < 0.001$ .

**Table S2E.** Multilevel regression analysis predicting staff's vaccine constraints, with the institution ID as the second-level factor

|                                               | Model 1 (N = 156, RCHE = 25) |       |        |         | Model 2 (N = 125, RCHE = 18) |       |        |        |
|-----------------------------------------------|------------------------------|-------|--------|---------|------------------------------|-------|--------|--------|
|                                               | b                            | SE    | t      | p       | b                            | SE    | t      | p      |
| Age                                           | -0.002                       | 0.010 | -0.183 | 0.855   | 0.002                        | 0.012 | 0.202  | 0.841  |
| Female                                        | -0.002                       | 0.438 | -0.005 | 0.996   | -0.298                       | 0.516 | -0.577 | 0.565  |
| Emotional loneliness                          | 0.124                        | 0.047 | 2.644  | 0.009** | 0.128                        | 0.056 | 2.278  | 0.025* |
| Social loneliness                             | 0.060                        | 0.048 | 1.261  | 0.209   | 0.022                        | 0.059 | 0.366  | 0.715  |
| Anxiety                                       | 0.091                        | 0.037 | 2.441  | 0.016*  | 0.095                        | 0.049 | 1.949  | 0.054  |
| Number of vaccines uptaken                    | -0.276                       | 0.223 | -1.241 | 0.217   | -0.368                       | 0.236 | -1.558 | 0.122  |
| Ever infected by COVID-19                     | -0.035                       | 0.207 | -0.167 | 0.867   | -0.067                       | 0.237 | -0.285 | 0.776  |
| Size of the residential home                  |                              |       |        |         | 0.002                        | 0.001 | 1.690  | 0.094  |
| Resident infected rate                        |                              |       |        |         | 1.661                        | 1.397 | 1.189  | 0.237  |
| RCHE's vaccination rate (with 1 dose or more) |                              |       |        |         | -0.454                       | 0.345 | -1.317 | 0.190  |

.  $p < 0.10$ , \* $p < 0.05$ , \*\* $p < 0.01$ , \*\*\* $p < 0.001$ .

**Table S2F.** Multilevel regression analysis predicting staff's vaccine collective responsibility, with the institution ID as the second-level factor

|                                               | Model 1 (N = 156, RCHE = 25) |       |        |       | Model 2 (N = 125, RCHE = 18) |       |        |        |
|-----------------------------------------------|------------------------------|-------|--------|-------|------------------------------|-------|--------|--------|
|                                               | b                            | SE    | t      | p     | b                            | SE    | t      | p      |
| Age                                           | 0.004                        | 0.009 | 0.465  | 0.643 | 0.005                        | 0.010 | 0.474  | 0.636  |
| Female                                        | -0.010                       | 0.377 | -0.027 | 0.979 | 0.045                        | 0.427 | 0.105  | 0.917  |
| Emotional loneliness                          | -0.062                       | 0.041 | -1.521 | 0.130 | -0.090                       | 0.046 | -1.943 | 0.055  |
| Social loneliness                             | -0.057                       | 0.041 | -1.370 | 0.173 | -0.093                       | 0.049 | -1.890 | 0.061  |
| Anxiety                                       | -0.031                       | 0.032 | -0.974 | 0.331 | -0.044                       | 0.041 | -1.077 | 0.284  |
| Number of vaccines uptaken                    | 0.135                        | 0.196 | 0.690  | 0.491 | 0.205                        | 0.197 | 1.040  | 0.301  |
| Ever infected by COVID-19                     | -0.115                       | 0.185 | -0.621 | 0.536 | -0.099                       | 0.199 | -0.497 | 0.621  |
| Size of the residential home                  |                              |       |        |       | -0.003                       | 0.001 | -2.002 | 0.106  |
| Resident infected rate                        |                              |       |        |       | -2.549                       | 1.189 | -2.143 | 0.039* |
| RCHE's vaccination rate (with 1 dose or more) |                              |       |        |       | 0.230                        | 0.302 | 0.760  | 0.461  |

.  $p < 0.10$ , \* $p < 0.05$ , \*\* $p < 0.01$ , \*\*\* $p < 0.001$ .
